# Supplementary material for: Enhanced upconversion fluorescent probe of single NaYF4:Yb3+/Er3+/Zn2+ nanoparticles for copper ion detection
Source: PubMed Central journal article supplement — RSC Adv. 2018 Nov 8;8(66):37618–22. doi: 10.1039/c8ra07103a (PMC9089350; doi:10.1039/c8ra07103a), 2018-11-08
Supplement: RA-008-C8RA07103A-s001.pdf [file RA-008-C8RA07103A-s001.pdf]

Supporting Information

**Enhanced upconversion fluorescence probe of single  
NaYF<sub>4</sub>:Yb<sup>3+</sup>/Er<sup>3+</sup>/Zn<sup>2+</sup> nanoparticle for copper ion detection**

Baobao Zhang,<sup>a</sup> Jiajia Meng,<sup>a</sup> Xiaohu Mi,<sup>a</sup> Changjian Zhang,<sup>a</sup> Zhenglong Zhang<sup>\*a</sup> and Hairong Zheng<sup>\*a</sup>

School of Physics and Information Technology, Shaanxi Normal University, 710119, Xi'an, China

Supporting Figures

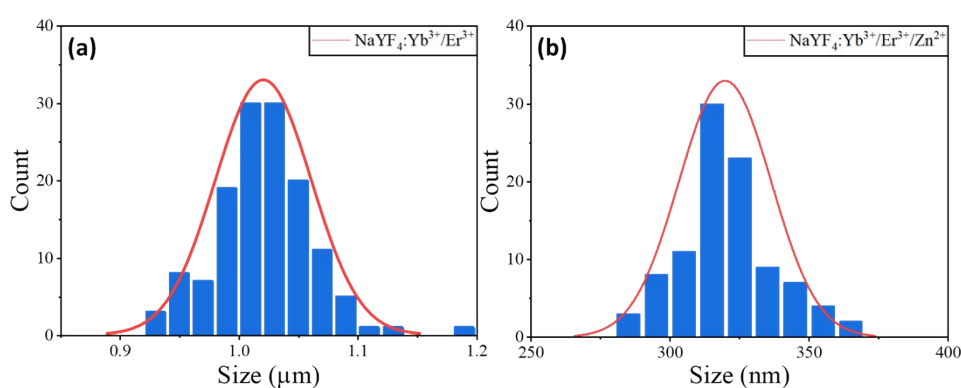

Figure S1 (a) The size distribution of NaYF<sub>4</sub>:Yb<sup>3+</sup>/Er<sup>3+</sup> microdisks, (b) the size distribution of NaYF<sub>4</sub>:Yb<sup>3+</sup>/Er<sup>3+</sup>/Zn<sup>2+</sup> nanoparticles.

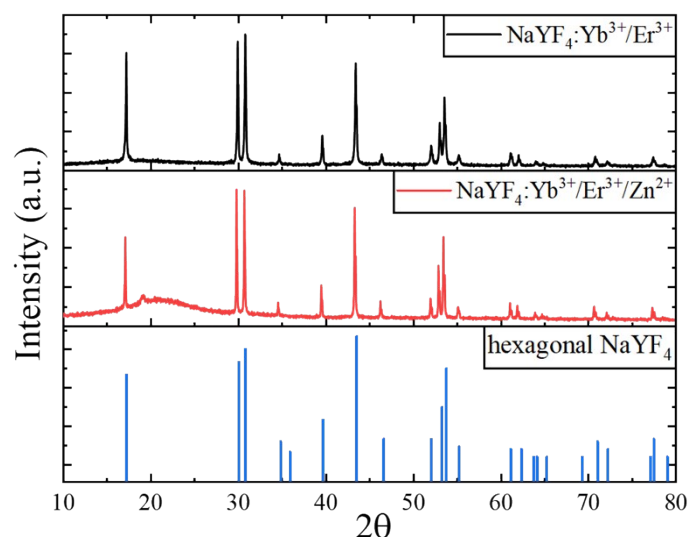

Figure S2 XRD spectra of NaYF<sub>4</sub>:Yb<sup>3+</sup>/Er<sup>3+</sup> microdisks and NaYF<sub>4</sub>:Yb<sup>3+</sup>/Er<sup>3+</sup>/Zn<sup>2+</sup> nanoparticles

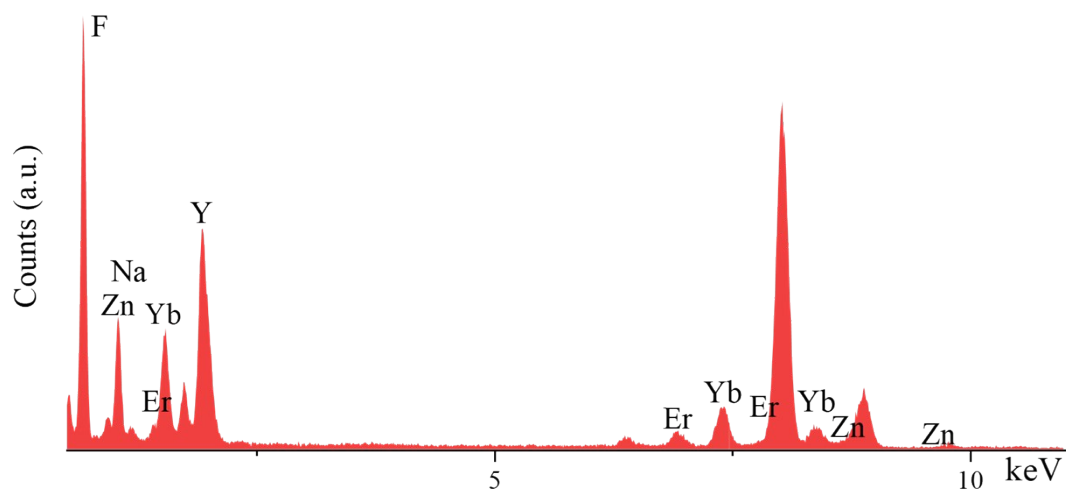

Figure S3 Energy dispersive spectrum of the NaYF<sub>4</sub>:Yb<sup>3+</sup>/Er<sup>3+</sup>/Zn<sup>2+</sup> nanoparticles.

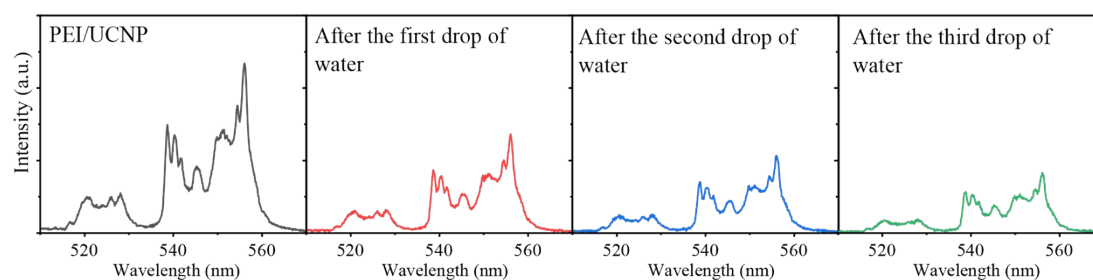

Figure S4 Emission spectra of the single particle fluorescence probe before and after dropping water solvent onto the particle.

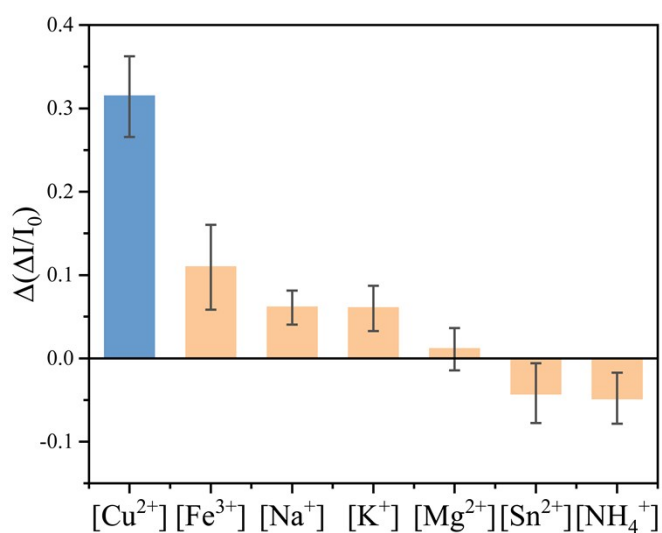

Figure S5 Fluorescence quenching of the single particle probe with 60nM copper ion solution and 600nM other ions (Fe<sup>3+</sup>, Na<sup>+</sup>, K<sup>+</sup>, Mg<sup>2+</sup>, Sn<sup>2+</sup>, NH<sub>4</sub><sup>+</sup>) solution.

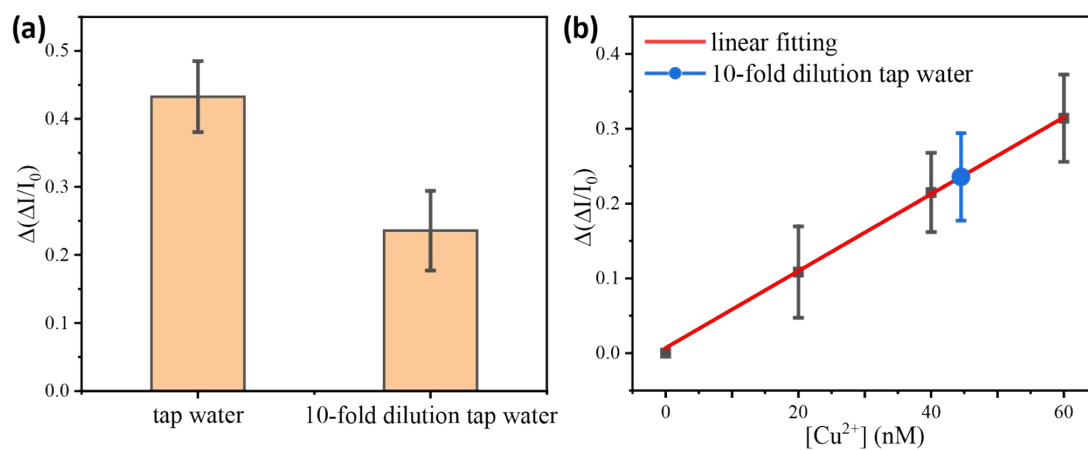

Figure S6 (a) Fluorescence quenching of the single particle probe with tap water and ten-fold dilution tap water, (b) the degree of fluorescence quenching with the diluted tap water marked on the fitted data plot (from Figure 5b) and the concentration of  $Cu^{2+}$  in the tap water was estimated to be 0.3-0.6 $\mu$ M.
